# Supplementary material
Source: bioRxiv or medRxiv preprint supplement (https://www.medrxiv.org/highwire/filestream/68862/field_highwire_adjunct_files/0/19004358-1.pdf)
Supplement: Supplementary file [file 19004358-1.pdf]

## Supplementary Information

# Estimating the health impact of vaccination against 10 pathogens in 98 low and middle income countries from 2000 to 2030

### Authors

Xiang Li<sup>1</sup>, Christinah Mukandavire<sup>1</sup>, Zulma M Cucunubá, Kaja Abbas<sup>2</sup>, Hannah E Clapham<sup>2</sup>, Mark Jit<sup>2</sup>, Hope L Johnson<sup>2</sup>, Timos Papadopoulos<sup>2</sup>, Emilia Vynnycky<sup>2</sup>, Marc Brisson<sup>3</sup>, Emily D Carter<sup>3</sup>, Andrew Clark<sup>3</sup>, Margaret J de Villiers<sup>3</sup>, Kirsten Eilertson<sup>3</sup>, Matthew J Ferrari<sup>3</sup>, Ivane Gamkrelidze<sup>3</sup>, Katy Gaythorpe<sup>3</sup>, Nicholas C Grassly<sup>3</sup>, Timothy B Hallett<sup>3</sup>, Michael L Jackson<sup>3</sup>, Kévin Jean<sup>3</sup>, Andromachi Karachaliou<sup>3</sup>, Petra Klepac<sup>3</sup>, Justin Lessler<sup>3</sup>, Xi Li<sup>3</sup>, Sean M Moore<sup>3</sup>, Shevanthi Nayagam<sup>3</sup>, Duy Manh Nguyen<sup>3</sup>, Homie Razavi<sup>3</sup>, Devin Razavi-Shearer<sup>3</sup>, Stephen Resch<sup>3</sup>, Colin Sanderson<sup>3</sup>, Steven Sweet<sup>3</sup>, Stephen Sy<sup>3</sup>, Yvonne Tam<sup>3</sup>, Hira Tanvir<sup>3</sup>, Quan Minh Tran<sup>3</sup>, Caroline L Trotter<sup>3</sup>, Shaun Truelove<sup>3</sup>, Kevin van Zandvoort<sup>3</sup>, Stéphane Verguet<sup>3</sup>, Neff Walker<sup>3</sup>, Amy Winter<sup>3</sup>, Neil M Ferguson<sup>4</sup>, Tini Garske (Vaccine Impact Modelling Consortium)

MRC Centre for Global Infectious Disease Analysis, School of Public Health, (Xiang Li PhD, C Mukandavire PhD, Z M Cucunubá MD PhD, M J de Villiers PhD, K Gaythorpe PhD, N C Grassly, T B Hallett, K Jean PhD, S Nayagam PhD, N M Ferguson, T Garske PhD), *and Department of Surgery and Cancer (S Nayagam PhD)*, Imperial College London, London, UK; London School of Hygiene & Tropical Medicine (K Abbas, M Jit, A Clark, P Klepac, C Sanderson, H Tanvir, K van Zandvoort, E Vynnycky PhD); Oxford University Clinical Research Unit (H E Clapham PhD, D M Nguyen, Q M Tran PhD); Gavi, the Vaccine Alliance (H L Johnson PhD MPH); Public Health England (T Papadopoulos PhD, E Vynnycky PhD, M Jit); Laval University (M Brisson); Department of Epidemiology, Bloomberg School of Public Health (J Lessler PhD, S Truelove PhD, A Winter PhD), and Bloomberg School of Public Health, (E D Carter PhD, Y Tam MHS, N Walker PhD), Johns Hopkins University; The Pennsylvania State University (K Eilertson PhD, M J Ferrari PhD); Center for Disease Analysis Foundation, Lafayette, Colorado, USA (I Gamkrelidze, H Razavi PhD, D Razavi-Shearer); Kaiser Permanente Washington (M Jackson PhD); University of Cambridge (A Karachaliou Mmath, C L Trotter BA MSc PhD); Unaffiliated (Xi Li); Department of Biological Sciences, University of Notre Dame (S Moore PhD, Q M Tran PhD); Harvard T.H. Chan School of Public Health (S Resch PhD, S Sweet MSM, S Sy MS, S Verguet) *and Center for Health Decision Science, Harvard T.H. Chan School of Public Health, Harvard University (S Resch PhD, S Sweet MSM, S Sy MS)*; Laboratoire MESuRS, Conservatoire National des Arts et Métiers, Paris, France (K Jean); Unité PACRI, Institut Pasteur, Conservatoire National des Arts et Métiers, Paris, France (K Jean); University of Hong Kong (M Jit); Nuffield Department of Medicine (H E Clapham PhD)

---

<sup>1</sup> Contributed equally (current VIMC science team)

<sup>2</sup> Contributed equally (writing group)

<sup>3</sup> Contributed equally

<sup>4</sup> Corresponding author. Email: [neil.ferguson@imperial.ac.uk](mailto:neil.ferguson@imperial.ac.uk); MRC Centre for Global Infectious Disease Analysis, School of Public Health, Imperial College London, Norfolk Place, London, W2 1PG, UK

## Tables

**Table S1.** List of 98 low and middle income countries included in the analysis, including the 73 countries currently eligible for Gavi support. WHO region corresponds to the WHO Regional Offices in Africa (AFRO), Eastern Mediterranean (EMRO), Europe (EURO), South East Asia (SEARO) and Western Pacific (WPRO).

| Country code | Country name                     | Gavi 73 | WHO region |
|--------------|----------------------------------|---------|------------|
| AFG          | Afghanistan                      | TRUE    | EMRO       |
| AGO          | Angola                           | TRUE    | AFRO       |
| ALB          | Albania                          | FALSE   | EURO       |
| ARM          | Armenia                          | TRUE    | EURO       |
| AZE          | Azerbaijan                       | TRUE    | EURO       |
| BDI          | Burundi                          | TRUE    | AFRO       |
| BEN          | Benin                            | TRUE    | AFRO       |
| BFA          | Burkina Faso                     | TRUE    | AFRO       |
| BGD          | Bangladesh                       | TRUE    | SEARO      |
| BIH          | Bosnia and Herzegovina           | FALSE   | EURO       |
| BLZ          | Belize                           | FALSE   | PAHO       |
| BOL          | Bolivia                          | TRUE    | PAHO       |
| BTN          | Bhutan                           | TRUE    | SEARO      |
| CAF          | Central African Republic         | TRUE    | AFRO       |
| CHN          | China                            | FALSE   | WPRO       |
| CIV          | Cote d'Ivoire                    | TRUE    | AFRO       |
| CMR          | Cameroon                         | TRUE    | AFRO       |
| COD          | Democratic Republic of the Congo | TRUE    | AFRO       |
| COG          | Congo                            | TRUE    | AFRO       |
| COM          | Comoros                          | TRUE    | AFRO       |
| CPV          | Cabo Verde                       | FALSE   | AFRO       |
| CUB          | Cuba                             | TRUE    | PAHO       |
| DJI          | Djibouti                         | TRUE    | EMRO       |
| EGY          | Egypt                            | FALSE   | EMRO       |
| ERI          | Eritrea                          | TRUE    | AFRO       |
| ETH          | Ethiopia                         | TRUE    | AFRO       |
| FJI          | Fiji                             | FALSE   | WPRO       |
| FSM          | Federated States of Micronesia   | FALSE   | WPRO       |
| GEO          | Georgia                          | TRUE    | EURO       |
| GHA          | Ghana                            | TRUE    | AFRO       |
| GIN          | Guinea                           | TRUE    | AFRO       |
| GMB          | Gambia                           | TRUE    | AFRO       |
| GNB          | Guinea-Bissau                    | TRUE    | AFRO       |
| GTM          | Guatemala                        | FALSE   | PAHO       |
| GUY          | Guyana                           | TRUE    | PAHO       |
| HND          | Honduras                         | TRUE    | PAHO       |
| HTI          | Haiti                            | TRUE    | PAHO       |
| IDN          | Indonesia                        | TRUE    | SEARO      |
| IND          | India                            | TRUE    | SEARO      |

|     |                       |       |       |
|-----|-----------------------|-------|-------|
| IRQ | Iraq                  | FALSE | EMRO  |
| KEN | Kenya                 | TRUE  | AFRO  |
| KGZ | Kyrgyzstan            | TRUE  | EURO  |
| KHM | Cambodia              | TRUE  | WPRO  |
| KIR | Kiribati              | TRUE  | WPRO  |
| LAO | Laos                  | TRUE  | WPRO  |
| LBR | Liberia               | TRUE  | AFRO  |
| LKA | Sri Lanka             | TRUE  | SEARO |
| LSO | Lesotho               | TRUE  | AFRO  |
| MAR | Morocco               | FALSE | EMRO  |
| MDA | Moldova               | TRUE  | EURO  |
| MDG | Madagascar            | TRUE  | AFRO  |
| MHL | Marshall Islands      | FALSE | WPRO  |
| MLI | Mali                  | TRUE  | AFRO  |
| MMR | Myanmar               | TRUE  | SEARO |
| MNG | Mongolia              | TRUE  | WPRO  |
| MOZ | Mozambique            | TRUE  | AFRO  |
| MRT | Mauritania            | TRUE  | AFRO  |
| MWI | Malawi                | TRUE  | AFRO  |
| NER | Niger                 | TRUE  | AFRO  |
| NGA | Nigeria               | TRUE  | AFRO  |
| NIC | Nicaragua             | TRUE  | PAHO  |
| NPL | Nepal                 | TRUE  | SEARO |
| PAK | Pakistan              | TRUE  | EMRO  |
| PHL | Philippines           | FALSE | WPRO  |
| PNG | Papua New Guinea      | TRUE  | WPRO  |
| PRK | North Korea           | TRUE  | SEARO |
| PRY | Paraguay              | FALSE | PAHO  |
| PSE | Palestine             | FALSE | PAHO  |
| RWA | Rwanda                | TRUE  | AFRO  |
| SDN | Sudan                 | TRUE  | EMRO  |
| SEN | Senegal               | TRUE  | AFRO  |
| SLB | Solomon Islands       | TRUE  | WPRO  |
| SLE | Sierra Leone          | TRUE  | AFRO  |
| SLV | El Salvador           | FALSE | PAHO  |
| SOM | Somalia               | TRUE  | EMRO  |
| SSD | South Sudan           | TRUE  | AFRO  |
| STP | Sao Tome and Principe | TRUE  | AFRO  |
| SWZ | Swaziland             | FALSE | AFRO  |
| SYR | Syria                 | FALSE | EMRO  |
| TCD | Chad                  | TRUE  | AFRO  |
| TGO | Togo                  | TRUE  | AFRO  |
| TJK | Tajikistan            | TRUE  | EURO  |
| TKM | Turkmenistan          | FALSE | EURO  |
| TLS | Timor-Leste           | TRUE  | SEARO |
| TON | Tonga                 | FALSE | WPRO  |

|     |            |       |      |
|-----|------------|-------|------|
| TUN | Tunisia    | FALSE | EMRO |
| TUV | Tuvalu     | FALSE | WPRO |
| TZA | Tanzania   | TRUE  | AFRO |
| UGA | Uganda     | TRUE  | AFRO |
| UKR | Ukraine    | TRUE  | EURO |
| UZB | Uzbekistan | TRUE  | EURO |
| VNM | Viet Nam   | TRUE  | WPRO |
| VUT | Vanuatu    | FALSE | WPRO |
| WSM | Samoa      | FALSE | WPRO |
| XK  | Kosovo     | FALSE | EURO |
| YEM | Yemen      | TRUE  | EMRO |
| ZMB | Zambia     | TRUE  | AFRO |
| ZWE | Zimbabwe   | TRUE  | AFRO |

**Table S2.** Number of countries eligible for Gavi support for routine vaccinations for each pathogen and each year from 2000 to 2018. MCV2: measles-containing vaccine, second dose; PCV3: pneumococcal conjugate vaccine 3rd dose; RCV2: rubella-containing vaccine, second dose.

| Year | HepB | Hib3 | HPV | JE | MCV2 | MenA | PCV3 | RCV2 | Rota | Rubella | YF |
|------|------|------|-----|----|------|------|------|------|------|---------|----|
| 2000 | 8    | 0    | 0   | 0  | 0    | 0    | 0    | 0    | 0    | 0       | 0  |
| 2001 | 23   | 1    | 0   | 0  | 0    | 0    | 0    | 0    | 0    | 0       | 1  |
| 2002 | 41   | 6    | 0   | 0  | 0    | 0    | 0    | 0    | 0    | 0       | 6  |
| 2003 | 43   | 6    | 0   | 0  | 0    | 0    | 0    | 0    | 0    | 0       | 9  |
| 2004 | 45   | 6    | 0   | 0  | 0    | 0    | 0    | 0    | 0    | 0       | 14 |
| 2005 | 50   | 13   | 0   | 0  | 0    | 0    | 0    | 0    | 0    | 0       | 14 |
| 2006 | 54   | 14   | 0   | 0  | 0    | 0    | 0    | 0    | 0    | 0       | 14 |
| 2007 | 56   | 18   | 0   | 0  | 1    | 0    | 0    | 0    | 0    | 0       | 14 |
| 2008 | 58   | 28   | 0   | 0  | 2    | 0    | 0    | 0    | 1    | 0       | 16 |
| 2009 | 63   | 48   | 0   | 0  | 2    | 0    | 0    | 0    | 2    | 0       | 16 |
| 2010 | 64   | 56   | 0   | 0  | 2    | 0    | 2    | 0    | 4    | 0       | 16 |
| 2011 | 63   | 58   | 0   | 0  | 2    | 0    | 15   | 0    | 5    | 0       | 16 |
| 2012 | 66   | 61   | 0   | 0  | 6    | 0    | 19   | 0    | 10   | 0       | 16 |
| 2013 | 68   | 67   | 0   | 0  | 8    | 0    | 30   | 0    | 15   | 0       | 16 |
| 2014 | 68   | 67   | 2   | 0  | 13   | 0    | 42   | 0    | 32   | 1       | 16 |
| 2015 | 68   | 68   | 2   | 0  | 17   | 0    | 53   | 0    | 37   | 12      | 16 |
| 2016 | 68   | 68   | 3   | 1  | 19   | 1    | 55   | 0    | 40   | 13      | 18 |
| 2017 | 67   | 67   | 13  | 2  | 20   | 8    | 57   | 21   | 43   | 21      | 16 |
| 2018 | 67   | 67   | 17  | 4  | 22   | 11   | 59   | 22   | 48   | 24      | 17 |

**Table S3(a):** Estimated total DALYs averted (in millions) by vaccination and DALYs averted per thousand individuals vaccinated in different annual birth cohort ranges across the 98 countries considered, stratified by pathogen for all ages and under-5s. Estimates quoted to two significant figures.

| Pathogen | Birth cohorts | DALYs averted (millions), lifetime | DALYs averted per 1000 vaccinated individuals, lifetime | DALYs averted (millions), <5 | DALYs averted per 1000 vaccinated individuals, <5 |
|----------|---------------|------------------------------------|---------------------------------------------------------|------------------------------|---------------------------------------------------|
| HepB     | 2000-2018     | 810 (480-1300)                     | 510 (300-800)                                           | 30 (4.9-100)                 | 19 (3.1-63)                                       |
|          | 2019-2030     | 760 (430-1200)                     | 430 (240-630)                                           | 27 (4.7-88)                  | 15 (2.7-50)                                       |
| Hib      | 2000-2018     | 100 (43-160)                       | 190 (78-280)                                            | 100 (43-160)                 | 190 (78-280)                                      |
|          | 2019-2030     | 150 (52-240)                       | 160 (57-260)                                            | 150 (52-240)                 | 160 (57-260)                                      |
| HPV      | 2000-2018     | 57 (37-72)                         | 340 (220-440)                                           | 0                            | 0                                                 |
|          | 2019-2030     | 110 (100-130)                      | 330 (290-370)                                           | 0                            | 0                                                 |
| JE       | 2000-2018     | 17 (1.3-35)                        | 41 (3.2-84)                                             | 6.7 (0.34-14)                | 16 (0.8-34)                                       |
|          | 2019-2030     | 24 (2-50)                          | 49 (4.2-100)                                            | 11 (0.83-23)                 | 22 (1.7-46)                                       |
| Measles  | 2000-2018     | 2100 (1400-2600)                   | 460 (320-570)                                           | 2000 (1400-2500)             | 450 (320-560)                                     |
|          | 2019-2030     | 1700 (690-2100)                    | 610 (250-750)                                           | 1700 (750-2100)              | 590 (270-720)                                     |
| MenA     | 2000-2018     | 12 (7.3-19)                        | 49 (29-76)                                              | 1.5 (0.085-4.3)              | 6.2 (0.3-17)                                      |
|          | 2019-2030     | 12 (5.7-20)                        | 44 (21-75)                                              | 2.7 (0.14-7.2)               | 10 (0.5-27)                                       |
| PCV      | 2000-2018     | 39 (18-67)                         | 200 (96-340)                                            | 39 (18-67)                   | 200 (96-340)                                      |
|          | 2019-2030     | 120 (51-230)                       | 160 (69-300)                                            | 120 (51-230)                 | 160 (69-300)                                      |
| Rota     | 2000-2018     | 8.8 (5.4-13)                       | 66 (40-95)                                              | 8.8 (5.4-13)                 | 66 (40-95)                                        |
|          | 2019-2030     | 43 (26-61)                         | 54 (33-78)                                              | 43 (26-61)                   | 54 (33-78)                                        |
| Rubella  | 2000-2018     | 56 (37-92)                         | 45 (30-74)                                              | 0 (0-0)                      | 0 (0-0)                                           |
|          | 2019-2030     | 36 (24-61)                         | 15 (10-25)                                              | 0 (0-0)                      | 0 (0-0)                                           |
| YF       | 2000-2018     | 240 (77-490)                       | 670 (210-1400)                                          | 35 (10-74)                   | 97 (30-210)                                       |
|          | 2019-2030     | 240 (76-480)                       | 840 (270-1800)                                          | 39 (12-83)                   | 140 (43-300)                                      |
| Total    | 2000-2018     | 3400 (2600-4200)                   | 360 (270-440)                                           | 2300 (1600-2800)             | 240 (180-290)                                     |
|          | 2019-2030     | 3200 (2100-3900)                   | 300 (190-360)                                           | 2000 (1000-2500)             | 190 (98-230)                                      |
|          | 2000-2030     | 6600 (4800-8000)                   | 330 (230-400)                                           | 4300 (2900-5100)             | 210 (140-260)                                     |

**Table S3(b):** Estimated total deaths averted (in thousands) by vaccination and deaths averted per thousand individuals vaccinated in different time period ranges across the 98 countries considered, stratified by pathogen for all ages and under-5s. Estimates quoted to two significant figures.

| Pathogen | Time period | Deaths averted (1000s), cross section | Deaths averted per 1000 vaccinated individuals, cross section | deaths averted (1000s), <5 | DALYs averted per 1000 vaccinated individuals, <5 |
|----------|-------------|---------------------------------------|---------------------------------------------------------------|----------------------------|---------------------------------------------------|
| HepB     | 2000-2018   | 560 (170-1400)                        | 0.3 (0.1-0.8)                                                 | 250 (46-960)               | 0.2 (0-0.6)                                       |
|          | 2019-2030   | 1700 (490-3100)                       | 0.9 (0.3-1.7)                                                 | 240 (63-880)               | 0.1 (0-0.5)                                       |
| Hib      | 2000-2018   | 1400 (650-2100)                       | 2.6 (1.1-3.7)                                                 | 1400 (650-2100)            | 2.6 (1.1-3.7)                                     |
|          | 2019-2030   | 2200 (810-3500)                       | 2.4 (0.9-3.7)                                                 | 2200 (810-3500)            | 2.4 (0.9-3.7)                                     |
| HPV      | 2000-2018   | 0                                     | 0                                                             | 0                          | 0                                                 |
|          | 2019-2030   | 0                                     | 0                                                             | 0                          | 0                                                 |
| JE       | 2000-2018   | 64 (3-160)                            | 0.2 (0-0.4)                                                   | 45 (2-120)                 | 0.1 (0-0.3)                                       |
|          | 2019-2030   | 180 (17-440)                          | 0.3 (0-0.7)                                                   | 93 (9-240)                 | 0.2 (0-0.4)                                       |
| Measles  | 2000-2018   | 31000 (23000-41000)                   | 6.5 (4.9-8.7)                                                 | 30000 (23000-41000)        | 6.5 (4.9-8.5)                                     |
|          | 2019-2030   | 25000 (11000-34000)                   | 8.6 (3.7-12)                                                  | 25000 (11000-33000)        | 8.4 (4-12)                                        |
| MenA     | 2000-2018   | 63 (2-290)                            | 0.2 (0-0.8)                                                   | 16 (0-74)                  | 0 (0-0.2)                                         |
|          | 2019-2030   | 150 (3-740)                           | 0.5 (0-2.6)                                                   | 35 (1-170)                 | 0.1 (0-0.6)                                       |
| PCV      | 2000-2018   | 490 (260-820)                         | 2.5 (1.3-4.1)                                                 | 490 (260-820)              | 2.5 (1.3-4.1)                                     |
|          | 2019-2030   | 1700 (780-3200)                       | 2.3 (1.1-4.1)                                                 | 1700 (780-3200)            | 2.3 (1.1-4.1)                                     |
| Rota     | 2000-2018   | 110 (76-150)                          | 0.8 (0.6-1.1)                                                 | 110 (76-150)               | 0.8 (0.6-1.1)                                     |
|          | 2019-2030   | 630 (390-870)                         | 0.8 (0.5-1.1)                                                 | 630 (390-870)              | 0.8 (0.5-1.1)                                     |
| Rubella  | 2000-2018   | 80 (36-200)                           | 0.1 (0-0.2)                                                   | 0 (0-0)                    | 0 (0-0)                                           |
|          | 2019-2030   | 290 (140-660)                         | 0.1 (0.1-0.3)                                                 | 0 (0-0)                    | 0 (0-0)                                           |
| YF       | 2000-2018   | 1200 (400-2500)                       | 4.1 (1.3-8.3)                                                 | 460 (140-970)              | 1.6 (0.5-3.3)                                     |
|          | 2019-2030   | 2400 (780-5100)                       | 4.4 (1.3-9)                                                   | 540 (160-1200)             | 1 (0.3-2.1)                                       |
| Total    | 2000-2018   | 35000 (28000-45000)                   | 3.7 (3.1-4.8)                                                 | 33000 (27000-43000)        | 3.6 (2.8-4.6)                                     |
|          | 2019-2030   | 35000 (18000-44000)                   | 3 (1.7-3.8)                                                   | 30000 (15000-39000)        | 2.7 (1.3-3.4)                                     |
|          | 2000-2030   | 69000 (51000-88000)                   | 3.3 (2.5-4.2)                                                 | 63000 (48000-82000)        | 3.1 (2.2-3.9)                                     |

**Table S3(c):** Estimated total DALYs averted (in millions) by vaccination and DALYs averted per thousand individuals vaccinated in different time periods across the 98 countries considered, stratified by pathogen. Both all age and under-5 DALYs averted are shown. Estimates quoted to two significant figures.

| Pathogen | Time period | DALYS averted (millions), cross section | DALYS averted per 1000 vaccinated individuals, cross section | DALYS averted (millions), <5 | DALYS averted per 1000 vaccinated individuals, <5 |
|----------|-------------|-----------------------------------------|--------------------------------------------------------------|------------------------------|---------------------------------------------------|
| HepB     | 2000-2018   | 54 (11-140)                             | 34 (7.3-87)                                                  | 27 (4-93)                    | 17 (2.6-58)                                       |
|          | 2019-2030   | 130 (31-240)                            | 76 (17-140)                                                  | 26 (4.6-87)                  | 15 (2.6-49)                                       |
| Hib      | 2000-2018   | 92 (40-140)                             | 170 (74-250)                                                 | 92 (40-140)                  | 170 (74-250)                                      |
|          | 2019-2030   | 150 (52-240)                            | 160 (57-260)                                                 | 150 (52-240)                 | 160 (57-260)                                      |
| HPV      | 2000-2018   | 0                                       | 0                                                            | 0                            | 0                                                 |
|          | 2019-2030   | 0                                       | 0                                                            | 0                            | 0                                                 |
| JE       | 2000-2018   | 7.3 (0.29-16)                           | 21 (0.8-43)                                                  | 5.3 (0.19-12)                | 15 (0.6-32)                                       |
|          | 2019-2030   | 19 (1.5-40)                             | 33 (2.6-67)                                                  | 11 (0.8-23)                  | 18 (1.3-38)                                       |
| Measles  | 2000-2018   | 2000 (1400-2600)                        | 420 (300-540)                                                | 2000 (1400-2500)             | 410 (300-530)                                     |
|          | 2019-2030   | 1700 (650-2200)                         | 560 (220-720)                                                | 1600 (700-2100)              | 550 (230-690)                                     |
| MenA     | 2000-2018   | 3.9 (0.096-18)                          | 11 (0.3-50)                                                  | 1.1 (0.023-5.2)              | 3.2 (0.1-15)                                      |
|          | 2019-2030   | 9.4 (0.19-46)                           | 34 (0.7-170)                                                 | 2.6 (0.056-12)               | 9.5 (0.2-43)                                      |
| PCV      | 2000-2018   | 32 (16-54)                              | 160 (84-280)                                                 | 32 (16-54)                   | 160 (84-280)                                      |
|          | 2019-2030   | 120 (51-220)                            | 160 (68-290)                                                 | 120 (51-220)                 | 160 (68-290)                                      |
| Rota     | 2000-2018   | 7.4 (4.9-9.9)                           | 55 (36-74)                                                   | 7.4 (4.9-9.9)                | 55 (36-74)                                        |
|          | 2019-2030   | 41 (25-59)                              | 53 (33-75)                                                   | 41 (25-59)                   | 53 (33-75)                                        |
| Rubella  | 2000-2018   | 8.7 (5.3-16)                            | 7.7 (4.7-14)                                                 | 0 (0-0)                      | 0 (0-0)                                           |
|          | 2019-2030   | 32 (21-54)                              | 13 (8.5-22)                                                  | 0 (0-0)                      | 0 (0-0)                                           |
| YF       | 2000-2018   | 69 (23-150)                             | 240 (79-490)                                                 | 29 (9.1-62)                  | 100 (31-210)                                      |
|          | 2019-2030   | 140 (44-290)                            | 240 (79-510)                                                 | 36 (11-78)                   | 65 (20-140)                                       |
| Total    | 2000-2018   | 2200 (1700-2800)                        | 240 (180-300)                                                | 2100 (1600-2700)             | 230 (170-290)                                     |
|          | 2019-2030   | 2300 (1200-2900)                        | 200 (100-250)                                                | 2000 (990-2500)              | 180 (87-220)                                      |
|          | 2000-2030   | 4600 (3100-5500)                        | 220 (150-270)                                                | 4200 (2900-5000)             | 200 (140-250)                                     |

**Table S4(a):** Estimated total deaths averted (in thousands) by vaccination and deaths averted per thousand individuals vaccinated in different annual birth cohort ranges across the 73 Gavi countries, stratified by pathogen. Both lifetime and under-5 deaths averted are shown. Estimates quoted to two significant figures.

| Pathogen | Birth cohorts | Deaths averted (1000), lifetime | Deaths averted per 1000 vaccinated individuals, lifetime | Deaths averted (1000s), <5 | Deaths averted per 1000 vaccinated individuals, <5 |
|----------|---------------|---------------------------------|----------------------------------------------------------|----------------------------|----------------------------------------------------|
| HepB     | 2000-2018     | 12000 (3500-25000)              | 13 (3.7-28)                                              | 160 (17-600)               | 0.2 (0-0.7)                                        |
|          | 2019-2030     | 13000 (3600-31000)              | 9.9 (2.7-24)                                             | 180 (20-640)               | 0.1 (0-0.5)                                        |
| Hib      | 2000-2018     | 1500 (660-2300)                 | 3.1 (1.3-4.5)                                            | 1500 (660-2300)            | 3.1 (1.3-4.5)                                      |
|          | 2019-2030     | 2100 (770-3400)                 | 2.5 (0.9-4)                                              | 2100 (770-3400)            | 2.5 (0.9-4)                                        |
| HPV      | 2000-2018     | 2600 (1000-4200)                | 16 (6-25)                                                | 0                          | 0                                                  |
|          | 2019-2030     | 4300 (2900-5800)                | 12 (8.3-17)                                              | 0                          | 0                                                  |
| JE       | 2000-2018     | 81 (3-210)                      | 0.3 (0-0.9)                                              | 12 (-4-40)                 | 0 (0-0.2)                                          |
|          | 2019-2030     | 130 (14-350)                    | 0.4 (0-1.1)                                              | 39 (4-120)                 | 0.1 (0-0.4)                                        |
| Measles  | 2000-2018     | 31000 (18000-44000)             | 9.2 (5.7-13)                                             | 30000 (18000-43000)        | 9 (5.5-13)                                         |
|          | 2019-2030     | 25000 (11000-35000)             | 11 (5-16)                                                | 24000 (11000-34000)        | 11 (5.2-16)                                        |
| MenA     | 2000-2018     | 220 (92-390)                    | 0.9 (0.4-1.6)                                            | 22 (0-69)                  | 0.1 (0-0.3)                                        |
|          | 2019-2030     | 200 (61-370)                    | 0.8 (0.2-1.4)                                            | 36 (-1-110)                | 0.1 (0-0.4)                                        |
| PCV      | 2000-2018     | 580 (270-1000)                  | 3.1 (1.5-5.4)                                            | 580 (270-1000)             | 3.1 (1.5-5.4)                                      |
|          | 2019-2030     | 1700 (760-3200)                 | 2.4 (1.1-4.5)                                            | 1700 (760-3200)            | 2.4 (1.1-4.5)                                      |
| Rota     | 2000-2018     | 130 (71-200)                    | 1.1 (0.6-1.6)                                            | 130 (71-200)               | 1.1 (0.6-1.6)                                      |
|          | 2019-2030     | 640 (360-970)                   | 0.8 (0.5-1.3)                                            | 640 (360-970)              | 0.8 (0.5-1.3)                                      |
| Rubella  | 2000-2018     | 430 (34-1400)                   | 0.5 (0-1.6)                                              | 0                          | 0                                                  |
|          | 2019-2030     | 290 (23-920)                    | 0.1 (0-0.4)                                              | 0                          | 0                                                  |
| YF       | 2000-2018     | 5600 (1800-12000)               | 16 (5.2-33)                                              | 550 (170-1300)             | 1.5 (0.5-3.3)                                      |
|          | 2019-2030     | 5000 (1600-11000)               | 18 (5.9-39)                                              | 570 (170-1300)             | 2.1 (0.6-4.5)                                      |
| Total    | 2000-2018     | 54000 (42000-66000)             | 7.7 (6.2-9.4)                                            | 33000 (26000-42000)        | 4.8 (3.7-6)                                        |
|          | 2019-2030     | 52000 (37000-66000)             | 5.7 (4-7.2)                                              | 29000 (16000-38000)        | 3.2 (1.8-4.1)                                      |
|          | 2000-2030     | 110000 (81000-140000)           | 6.6 (5-8.1)                                              | 63000 (46000-79000)        | 3.9 (2.8-4.9)                                      |



**Table S4(b):** Estimated total DALYs averted (in millions) by vaccination and DALYs averted per thousand individuals vaccinated in different annual birth cohort ranges across the 73 Gavi countries, stratified by pathogen. Both lifetime and under-5 DALYs averted estimates are shown. Estimates quoted to two significant figures.

| Pathogen | Birth cohorts | DALYs averted (millions), lifetime | DALYs averted per 1000 vaccinated individuals, lifetime | DALYs averted (millions), <5 | DALYs averted per 1000 vaccinated individuals, <5 |
|----------|---------------|------------------------------------|---------------------------------------------------------|------------------------------|---------------------------------------------------|
| HepB     | 2000-2018     | 470 (120-990)                      | 510 (130-1100)                                          | 17 (1.3-58)                  | 19 (1.5-64)                                       |
|          | 2019-2030     | 550 (140-1300)                     | 420 (110-980)                                           | 19 (1.6-64)                  | 14 (1.3-49)                                       |
| Hib      | 2000-2018     | 98 (41-150)                        | 200 (84-300)                                            | 98 (41-150)                  | 200 (84-300)                                      |
|          | 2019-2030     | 140 (50-230)                       | 170 (60-280)                                            | 140 (50-230)                 | 170 (60-280)                                      |
| HPV      | 2000-2018     | 58 (23-92)                         | 350 (140-550)                                           | 0 (0-0)                      | 0 (0-0)                                           |
|          | 2019-2030     | 110 (79-160)                       | 330 (220-440)                                           | 0 (0-0)                      | 0 (0-0)                                           |
| JE       | 2000-2018     | 7.5 (0.2-17)                       | 31 (0.9-70)                                             | 1.4 (-0.39-3.9)              | 5.6 (-1.6-16)                                     |
|          | 2019-2030     | 13 (1.1-30)                        | 42 (3.7-97)                                             | 4.3 (0.38-12)                | 14 (1.3-38)                                       |
| Measles  | 2000-2018     | 2000 (1100-2800)                   | 590 (350-830)                                           | 1900 (1100-2800)             | 570 (340-820)                                     |
|          | 2019-2030     | 1600 (680-2400)                    | 730 (300-1100)                                          | 1600 (700-2300)              | 710 (310-1100)                                    |
| MenA     | 2000-2018     | 12 (5.5-20)                        | 49 (22-81)                                              | 1.5 (0.003-4.9)              | 6.2 (0-20)                                        |
|          | 2019-2030     | 12 (3.9-21)                        | 44 (14-78)                                              | 2.7 (-0.042-8.2)             | 10 (-0.2-31)                                      |
| PCV      | 2000-2018     | 38 (17-66)                         | 200 (95-360)                                            | 38 (17-66)                   | 200 (95-360)                                      |
|          | 2019-2030     | 120 (49-220)                       | 170 (70-310)                                            | 120 (49-220)                 | 170 (70-310)                                      |
| Rota     | 2000-2018     | 8.4 (4.5-13)                       | 70 (37-110)                                             | 8.4 (4.5-13)                 | 70 (37-110)                                       |
|          | 2019-2030     | 42 (23-65)                         | 55 (31-85)                                              | 42 (23-65)                   | 55 (31-85)                                        |
| Rubella  | 2000-2018     | 47 (4.9-120)                       | 54 (5.7-140)                                            | 0                            | 0                                                 |
|          | 2019-2030     | 31 (3.2-79)                        | 15 (1.5-37)                                             | 0                            | 0                                                 |
| YF       | 2000-2018     | 240 (79-520)                       | 670 (210-1500)                                          | 35 (10-77)                   | 97 (30-220)                                       |
|          | 2019-2030     | 240 (76-510)                       | 840 (270-1900)                                          | 39 (11-86)                   | 140 (42-310)                                      |
| Total    | 2000-2018     | 2900 (2200-3500)                   | 420 (310-500)                                           | 2100 (1500-2600)             | 300 (220-370)                                     |
|          | 2019-2030     | 2900 (1800-3600)                   | 310 (200-390)                                           | 1900 (1000-2400)             | 210 (110-260)                                     |
|          | 2000-2030     | 5800 (4100-7000)                   | 360 (250-440)                                           | 4100 (2800-4800)             | 250 (170-300)                                     |

**Table S4(c):** Estimated total deaths averted (in thousands) by vaccination and deaths averted per thousand individuals vaccinated in different time period ranges across the 73 Gavi countries, stratified by pathogen. Both all age and under-5 deaths averted are shown. Estimates quoted to two significant figures.

| Pathogen | Time period | Deaths averted (1000),<br>cross section | Deaths averted per 1000<br>vaccinated individuals,<br>cross section | Deaths averted (1000), <5 | Deaths averted per 1000<br>vaccinated individuals, <5 |
|----------|-------------|-----------------------------------------|---------------------------------------------------------------------|---------------------------|-------------------------------------------------------|
| HepB     | 2000-2018   | 330 (50-860)                            | 0.4 (0.1-0.9)                                                       | 150 (14-560)              | 0.2 (0-0.6)                                           |
|          | 2019-2030   | 1100 (220-2900)                         | 0.8 (0.2-2.1)                                                       | 180 (18-630)              | 0.1 (0-0.5)                                           |
| Hib      | 2000-2018   | 1400 (630-2000)                         | 2.8 (1.3-4)                                                         | 1400 (630-2000)           | 2.8 (1.3-4)                                           |
|          | 2019-2030   | 2100 (770-3300)                         | 2.5 (0.9-4)                                                         | 2100 (770-3300)           | 2.5 (0.9-4)                                           |
| HPV      | 2000-2018   | 0                                       | 0                                                                   | 0                         | 0                                                     |
|          | 2019-2030   | 0                                       | 0                                                                   | 0                         | 0                                                     |
| JE       | 2000-2018   | 22 (-8-66)                              | 0.1 (0-0.4)                                                         | 9 (-5-32)                 | 0 (0-0.2)                                             |
|          | 2019-2030   | 78 (7-220)                              | 0.2 (0-0.6)                                                         | 36 (3-110)                | 0.1 (0-0.3)                                           |
| Measles  | 2000-2018   | 29000 (13000-46000)                     | 8.5 (3.7-14)                                                        | 29000 (13000-45000)       | 8.4 (3.9-13)                                          |
|          | 2019-2030   | 24000 (8600-38000)                      | 10 (3.6-16)                                                         | 24000 (8800-37000)        | 10 (3.7-16)                                           |
| MenA     | 2000-2018   | 63 (0-390)                              | 0.2 (0-1.1)                                                         | 16 (0-110)                | 0 (0-0.3)                                             |
|          | 2019-2030   | 150 (-24-900)                           | 0.5 (-0.1-3.2)                                                      | 35 (-1-220)               | 0.1 (0-0.8)                                           |
| PCV      | 2000-2018   | 480 (240-810)                           | 2.6 (1.3-4.4)                                                       | 480 (240-810)             | 2.6 (1.3-4.4)                                         |
|          | 2019-2030   | 1700 (750-3100)                         | 2.4 (1.1-4.3)                                                       | 1700 (750-3100)           | 2.4 (1.1-4.3)                                         |
| Rota     | 2000-2018   | 110 (62-160)                            | 0.9 (0.5-1.3)                                                       | 110 (62-160)              | 0.9 (0.5-1.3)                                         |
|          | 2019-2030   | 620 (350-950)                           | 0.8 (0.5-1.2)                                                       | 620 (350-950)             | 0.8 (0.5-1.2)                                         |
| Rubella  | 2000-2018   | 48 (-6-170)                             | 0.1 (0-0.2)                                                         | 0                         | 0                                                     |
|          | 2019-2030   | 240 (18-790)                            | 0.1 (0-0.4)                                                         | 0                         | 0                                                     |
| YF       | 2000-2018   | 1200 (390-2600)                         | 4.1 (1.3-8.7)                                                       | 460 (140-1100)            | 1.6 (0.5-3.5)                                         |
|          | 2019-2030   | 2400 (790-5400)                         | 4.4 (1.3-9.5)                                                       | 540 (160-1300)            | 1 (0.3-2.2)                                           |
| Total    | 2000-2018   | 33000 (26000-42000)                     | 4.9 (4-6.2)                                                         | 32000 (25000-41000)       | 4.7 (3.7-6)                                           |
|          | 2019-2030   | 33000 (17000-41000)                     | 3.4 (1.8-4.2)                                                       | 29000 (15000-37000)       | 3 (1.6-3.8)                                           |
|          | 2000-2030   | 61000 (45000-77000)                     | 3.7 (2.7-4.7)                                                       | 29000 (15000-37000)       | 3 (1.6-3.8)                                           |

**Table S4(d):** Estimated total DALYs averted (in millions) by vaccination and DALYs averted per thousand individuals vaccinated in different time period ranges across the 73 Gavi countries, stratified by pathogen. Both all age and under-5 DALYs averted estimates are shown. Estimates quoted to two significant figures.

| Pathogen | Time period | DALYs averted (millions), cross section | DALYs averted per 1000 vaccinated individuals, cross section | DALYs averted (millions), <5 | DALYs averted per 1000 vaccinated individuals, <5 |
|----------|-------------|-----------------------------------------|--------------------------------------------------------------|------------------------------|---------------------------------------------------|
| HepB     | 2000-2018   | 30 (3.4-81)                             | 33 (3.7-88)                                                  | 15 (1-53)                    | 16 (1.1-58)                                       |
|          | 2019-2030   | 86 (13-200)                             | 66 (10-150)                                                  | 18 (1.5-62)                  | 14 (1.1-48)                                       |
| Hib      | 2000-2018   | 88 (39-130)                             | 180 (79-270)                                                 | 88 (39-130)                  | 180 (79-270)                                      |
|          | 2019-2030   | 140 (50-230)                            | 170 (61-280)                                                 | 140 (50-230)                 | 170 (61-280)                                      |
| HPV      | 2000-2018   | 0                                       | 0                                                            | 0                            | 0                                                 |
|          | 2019-2030   | 0                                       | 0                                                            | 0                            | 0                                                 |
| JE       | 2000-2018   | 2.4 (-0.64-6.2)                         | 13 (-3.5-34)                                                 | 1 (-0.48-3.1)                | 5.6 (-2.6-17)                                     |
|          | 2019-2030   | 8.2 (0.64-21)                           | 21 (1.6-51)                                                  | 4 (0.33-11)                  | 10 (0.8-27)                                       |
| Measles  | 2000-2018   | 1900 (830-3000)                         | 540 (240-860)                                                | 1800 (850-2900)              | 530 (240-840)                                     |
|          | 2019-2030   | 1600 (570-2600)                         | 670 (240-1100)                                               | 1600 (580-2500)              | 650 (240-1100)                                    |
| MenA     | 2000-2018   | 3.9 (0-24)                              | 11 (0-68)                                                    | 1.1 (0-7.3)                  | 3.2 (0-21)                                        |
|          | 2019-2030   | 9.4 (-1.6-58)                           | 34 (-5.6-210)                                                | 2.6 (-0.11-17)               | 9.5 (-0.4-59)                                     |
| PCV      | 2000-2018   | 31 (15-53)                              | 170 (84-290)                                                 | 31 (15-53)                   | 170 (84-290)                                      |
|          | 2019-2030   | 110 (49-210)                            | 160 (69-300)                                                 | 110 (49-210)                 | 160 (69-300)                                      |
| Rota     | 2000-2018   | 7 (3.9-11)                              | 58 (33-86)                                                   | 7 (3.9-11)                   | 58 (33-86)                                        |
|          | 2019-2030   | 41 (23-64)                              | 54 (30-83)                                                   | 41 (23-64)                   | 54 (30-83)                                        |
| Rubella  | 2000-2018   | 5.3 (-0.74-15)                          | 7.3 (-1-21)                                                  | 0                            | 0                                                 |
|          | 2019-2030   | 26 (2.6-69)                             | 12 (1.1-32)                                                  | 0                            | 0                                                 |
| YF       | 2000-2018   | 69 (22-150)                             | 240 (77-510)                                                 | 29 (9-65)                    | 100 (31-220)                                      |
|          | 2019-2030   | 140 (43-310)                            | 240 (78-540)                                                 | 36 (11-81)                   | 65 (19-150)                                       |
| Total    | 2000-2018   | 2100 (1600-2600)                        | 310 (240-380)                                                | 2000 (1500-2500)             | 300 (230-370)                                     |
|          | 2000-2018   | 2200 (1100-2700)                        | 220 (110-280)                                                | 1900 (940-2400)              | 200 (98-250)                                      |
|          | 2000-2030   | 4200 (2900-5100)                        | 260 (180-310)                                                | 3900 (2700-4700)             | 240 (160-290)                                     |

## Legends for Excel files

The following table legends describe the data in the Excel files with the corresponding file name as Table S-.xlsx. The two files are Table S5.xlsx and Table S6.xlsx each with sheets (a-h) showing estimates for different combinations of view (calendar year, year of birth), age (all ages, under 5s), and time period (2000-2018, 2019-2030).

**Table S5(a).** Total deaths averted from all pathogens in each of the 98 countries among all age groups for 2000-2018 time periods, by calendar view (calendar year).

**Table S5(b).** Total deaths averted from all pathogens in each of the 98 countries among all age groups for 2019-2030 time periods, by calendar view (calendar year).

**Table S5(c).** Total deaths averted from all pathogens in each of the 98 countries among all age groups for 2000-2018 time periods, by cohort view (year of birth).

**Table S5(d).** Total deaths averted from all pathogens in each of the 98 countries among all age groups for 2019-2030 time periods, by cohort view (year of birth).

**Table S5(e).** Total deaths averted from all pathogens in each of the 98 countries among the under 5s age group for 2000-2018 time periods, by calendar view (calendar year).

**Table S5(f).** Total deaths averted from all pathogens in each of the 98 countries among the under 5s age group for 2019-2030 time periods, by calendar view (calendar year).

**Table S5(g).** Total deaths averted from all pathogens in each of the 98 countries among the under 5s age group for 2000-2018 time periods, by cohort view (year of birth).

**Table S5(h).** Total deaths averted from all pathogens in each of the 98 countries among under 5s age group for 2019-2030 time periods, by cohort view (year of birth).

**Table S6(a).** Deaths averted per 1000 vaccinated individuals by pathogen for each country among all age groups for 2000-2018 time periods, by calendar view (calendar year).

**Table S6(b).** Deaths averted per 1000 vaccinated individuals by pathogen for each country among all age groups for 2019-2030 time periods, by calendar view (calendar year).

**Table S6(c).** Deaths averted per 1000 vaccinated individuals by pathogen for each country among all age groups for 2000-2018 time periods, by cohort view (year of birth).

**Table S6(d).** Deaths averted per 1000 vaccinated individuals by pathogen for each country among all age groups for 2019-2030 time periods, by cohort view (year of birth).

**Table S6(e).** Deaths averted per 1000 vaccinated individuals by pathogen for each country among the under 5s age group for 2000-2018 time periods, by calendar view (calendar year).

**Table S6(f).** Deaths averted per 1000 vaccinated individuals by pathogen for each country among the under 5s age group for 2019-2030 time periods, by calendar view (calendar year).

**Table S6(g).** Deaths averted per 1000 vaccinated individuals by pathogen for each country among the under 5s age group for 2000-2018 time periods, by cohort view (year of birth).

**Table S6(h).** Deaths averted per 1000 vaccinated individuals by pathogen for each country among the under 5s age group for 2019-2030 time periods, by cohort view (year of birth).

## Figures

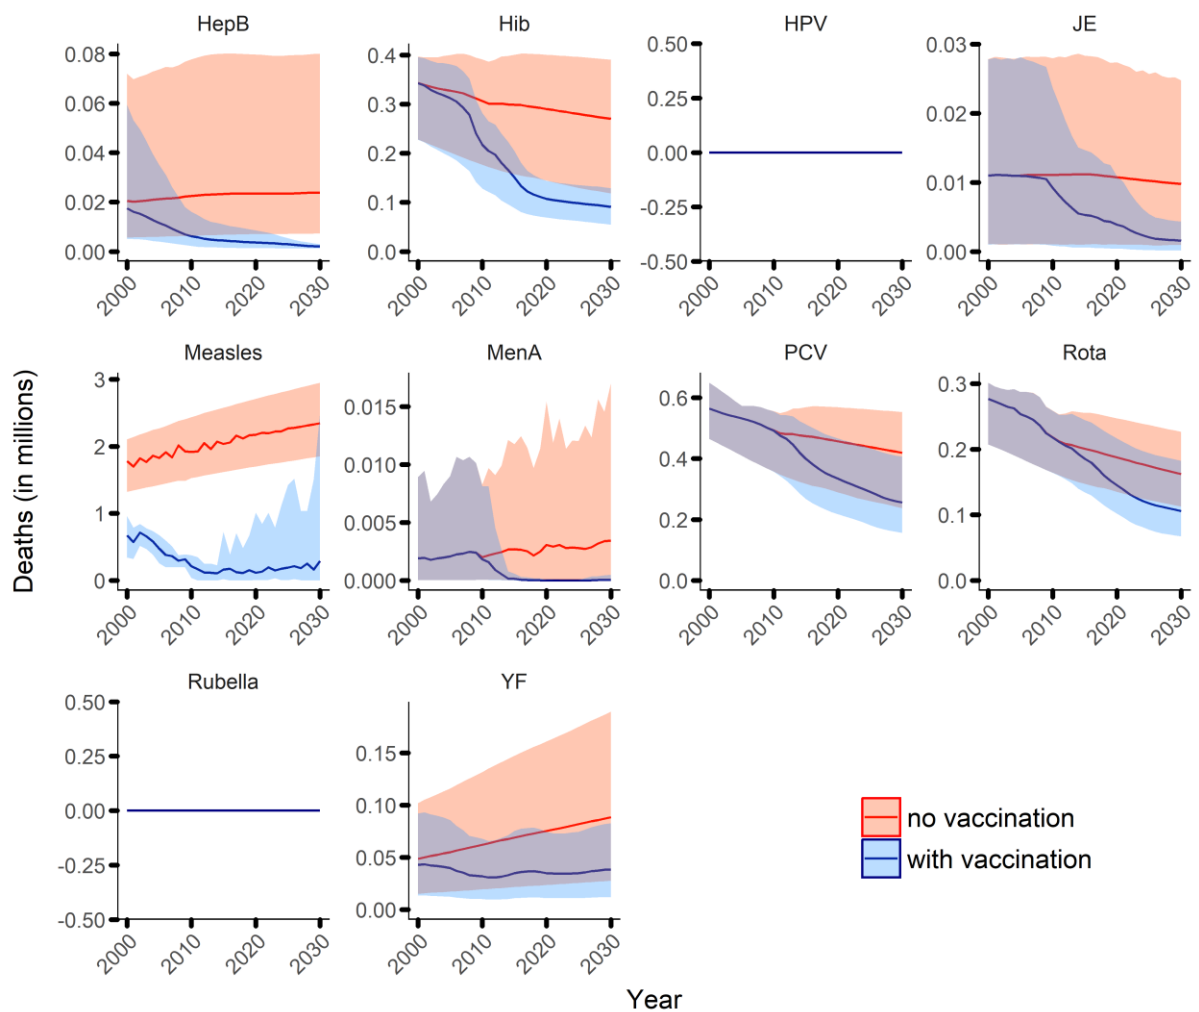

**Figure S1 (a):** Disease burden estimates in deaths by calendar year from 2000 to 2030 across all 98 countries for under-5s. Continuous red and blue lines show no vaccination and default vaccination coverage scenarios, respectively for the under 5s.

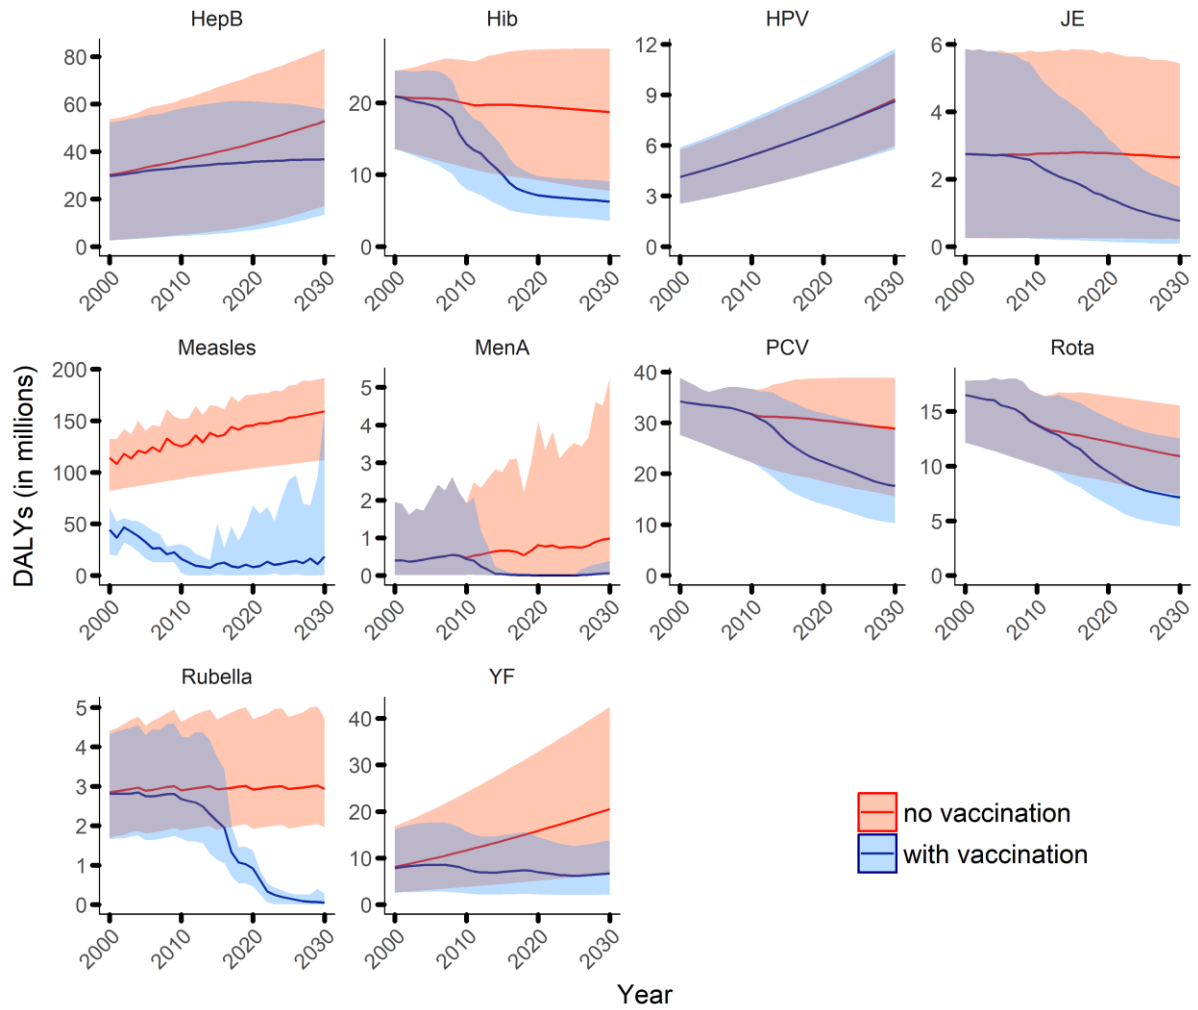

**Figure S1(b):** Disease burden estimates in DALYs by calendar year from 2000 to 2030 across all 98 countries for all ages. Continuous red and blue lines show no vaccination and default vaccination coverage scenarios, respectively, for all ages.

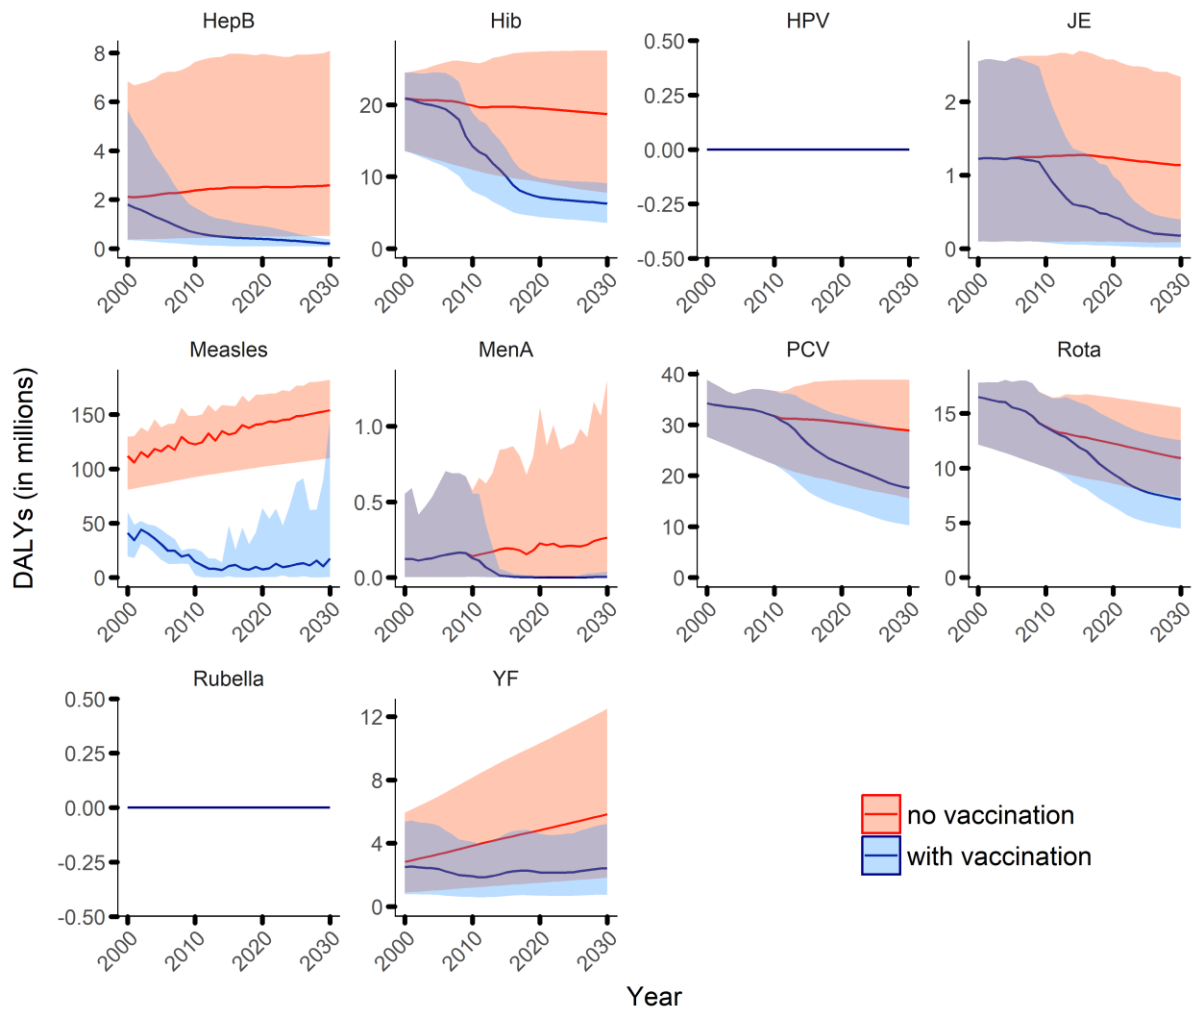

**Figure S1(c):** Disease burden estimates in DALYs by calendar year from 2000 to 2030 across all 98 countries for under-5s. Continuous red and blue lines show no vaccination and default vaccination coverage scenarios, respectively, for under 5s.



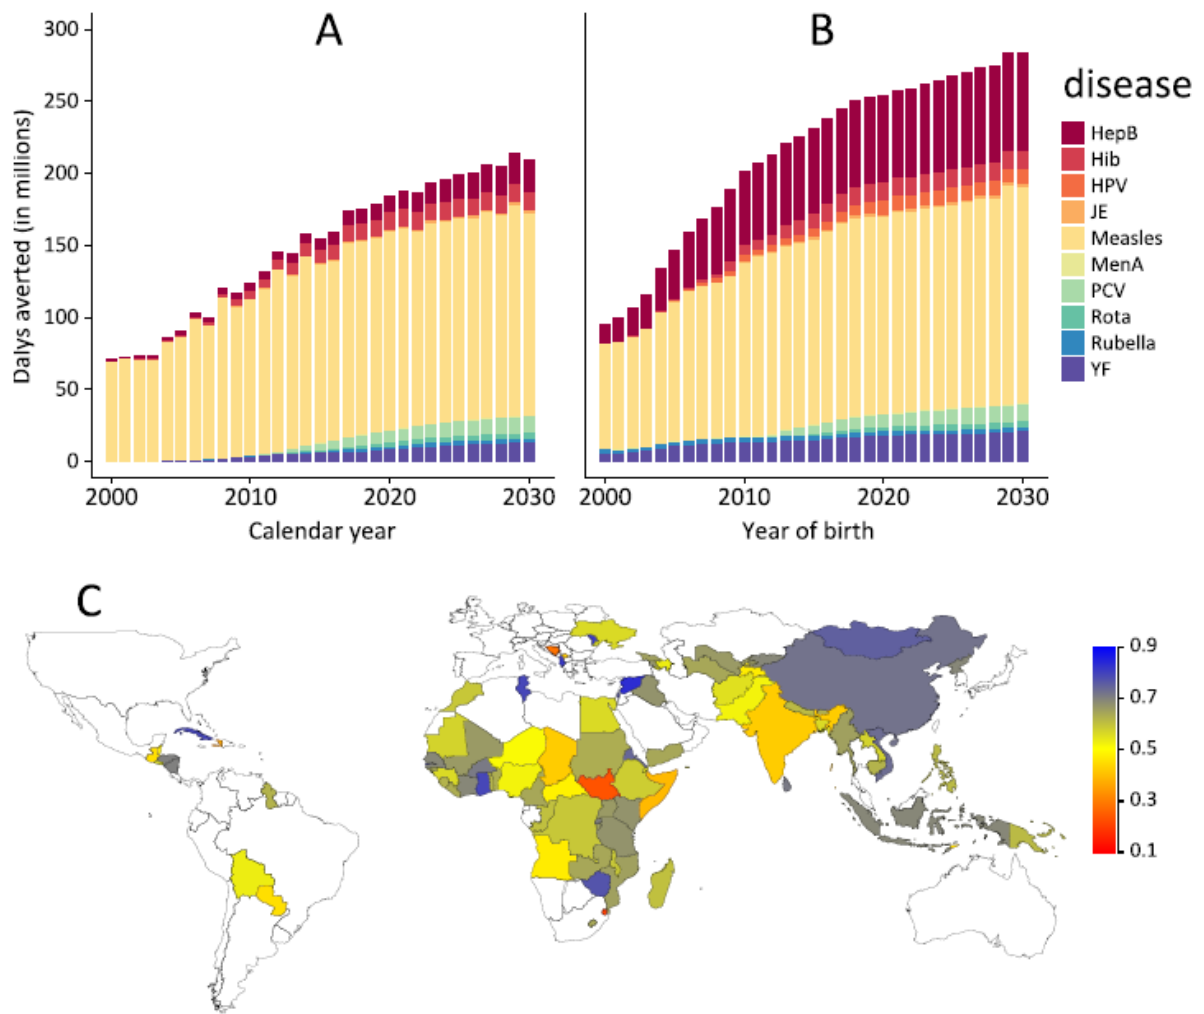

**Figure S2:** DALYs averted from 2000 to 2030 in the 98 countries: A) by calendar year (summing across all ages) and pathogen; B) by year of birth (summing across lifetime) and pathogen; C) proportion of lifetime DALYs due to the 10 pathogens in the no-vaccination counterfactual that are predicted to be averted by vaccination, by country across 2000-2018 birth cohorts.

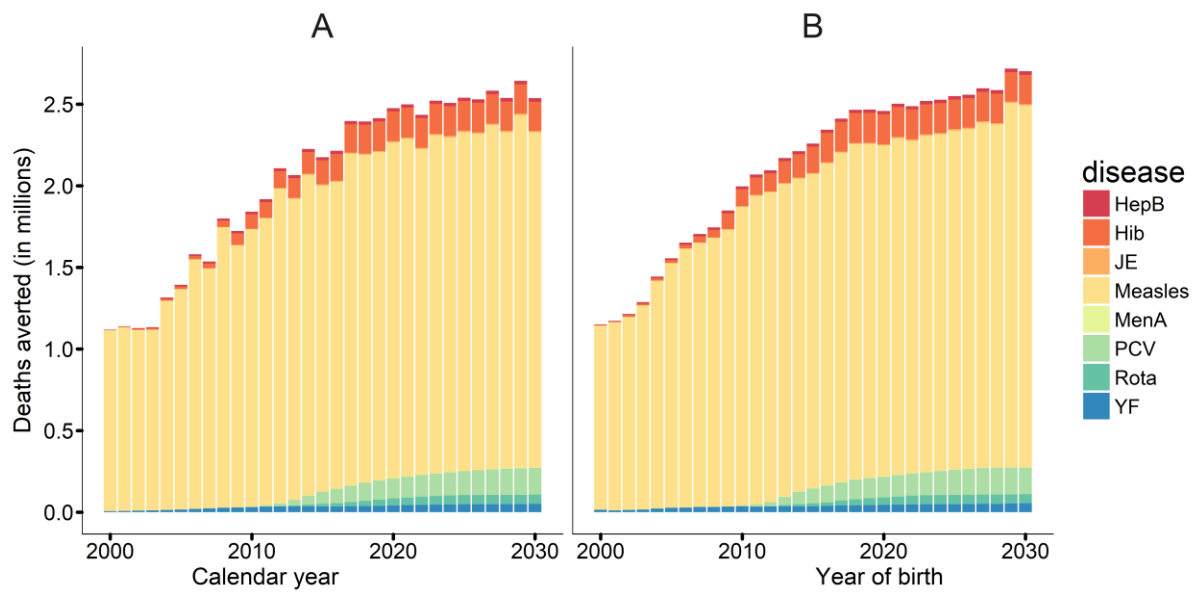

**Figure S3 (a):** Deaths averted from 2000 to 2030 in the 98 countries among the under 5s: A) by calendar year (summing across all ages) and pathogens; B) by year of birth (summing across lifetime) and pathogens.

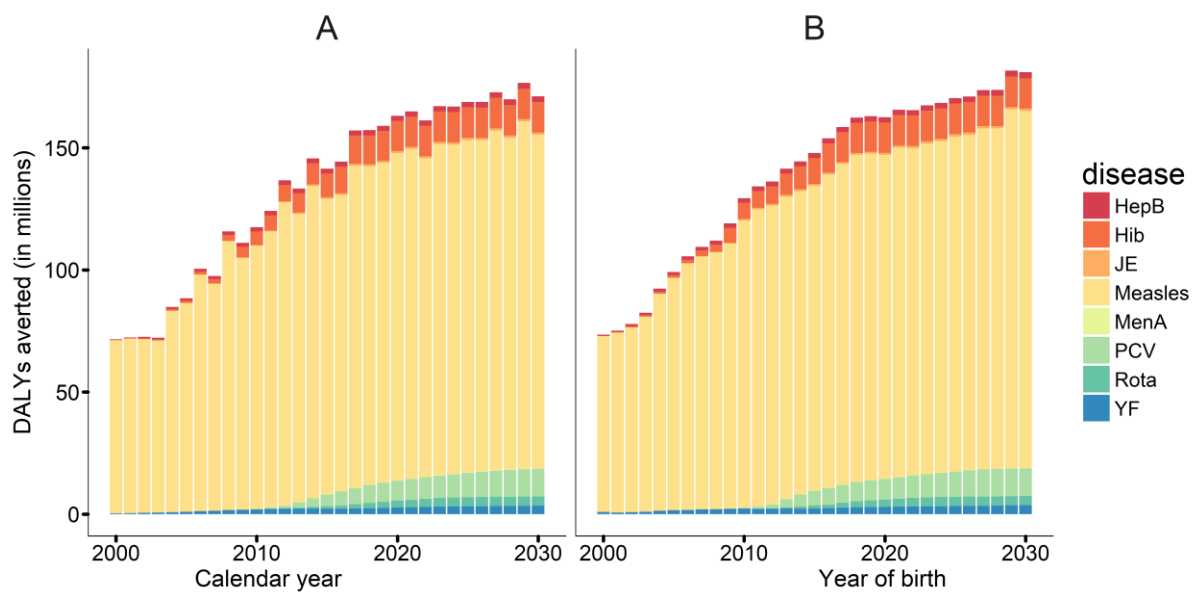

**Figure S3 (b):** DALYs averted from 2000 to 2030 in the 98 countries among the under 5s: A) by calendar year (summing across all ages) and pathogens; B) by year of birth (summing across lifetime) and pathogens.

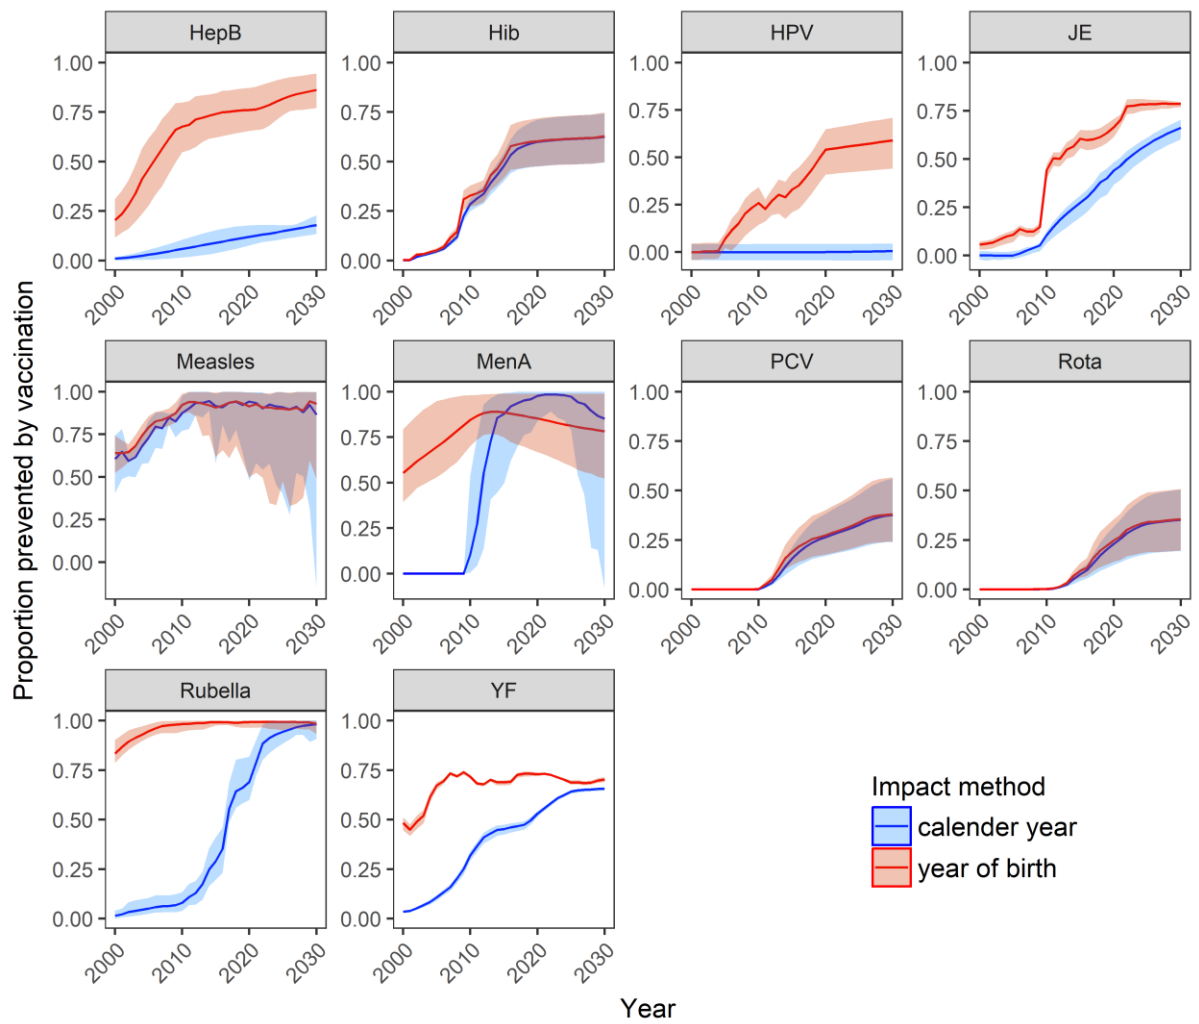

**Figure S4 (a).** Proportion of pathogen-specific deaths each year that would be prevented by vaccination by calendar year (blue) and year of birth (red). Solid lines show central estimates, shaded areas the 95% credible region

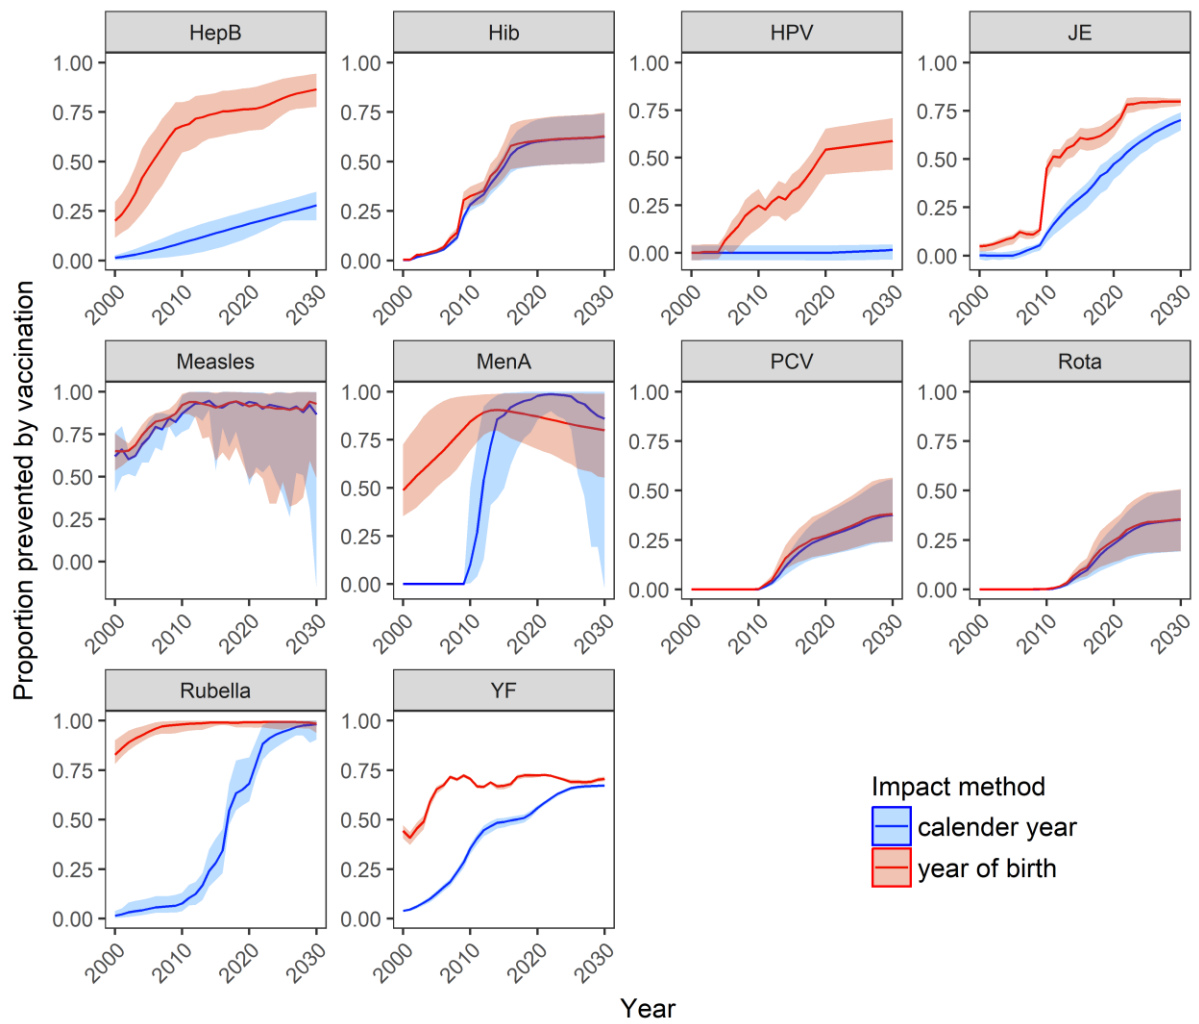

**Figure S4 (b).** Proportion of pathogen-specific DALYs each year that would be prevented by vaccination by calendar year (blue) and year of birth (red). Solid lines show central estimates, shaded areas the 95% credible region.
